# Supplementary material for: Fe 2 O 3 /g-C 3 N 4 /CdS photocatalysts for complete sunlight-active detoxification of the tetracycline antibiotic and Congo red dye in water
Source: Royal Society of Chemistry journal article supplement (doi:10.1039/d5ra04984a), 2025-01-01
Supplement: d5ra04984a1.pdf [file d5ra04984a1.pdf]

## Supporting Information

### **Fe<sub>2</sub>O<sub>3</sub>/g-C<sub>3</sub>N<sub>4</sub>/CdS photocatalyst for complete sunlight-active detoxification of tetracycline antibiotic**

Khemika Wannakan<sup>a,b</sup>, Sattra Nonthing<sup>a</sup>, Atchawadee Panchakeaw<sup>a</sup>, Suwat Nanan<sup>a\*</sup>

<sup>a</sup>Department of Chemistry and Center of Excellence for Innovation in Chemistry (PERCH-CIC),  
Faculty of Science, Khon Kaen University, Khon Kaen 40002, Thailand

<sup>b</sup>Department of Materials Science and Engineering, School of Molecular Science and  
Engineering, Vidyasirimedhi Institute of Science and Technology (VISTEC) Rayong 21210,  
Thailand

\* Corresponding author:

Tel: +66 43 202222 41 ext. 12370; fax: +66 43 202373

E-mail: [suwatna@kku.ac.th](mailto:suwatna@kku.ac.th) (Suwat Nanan)

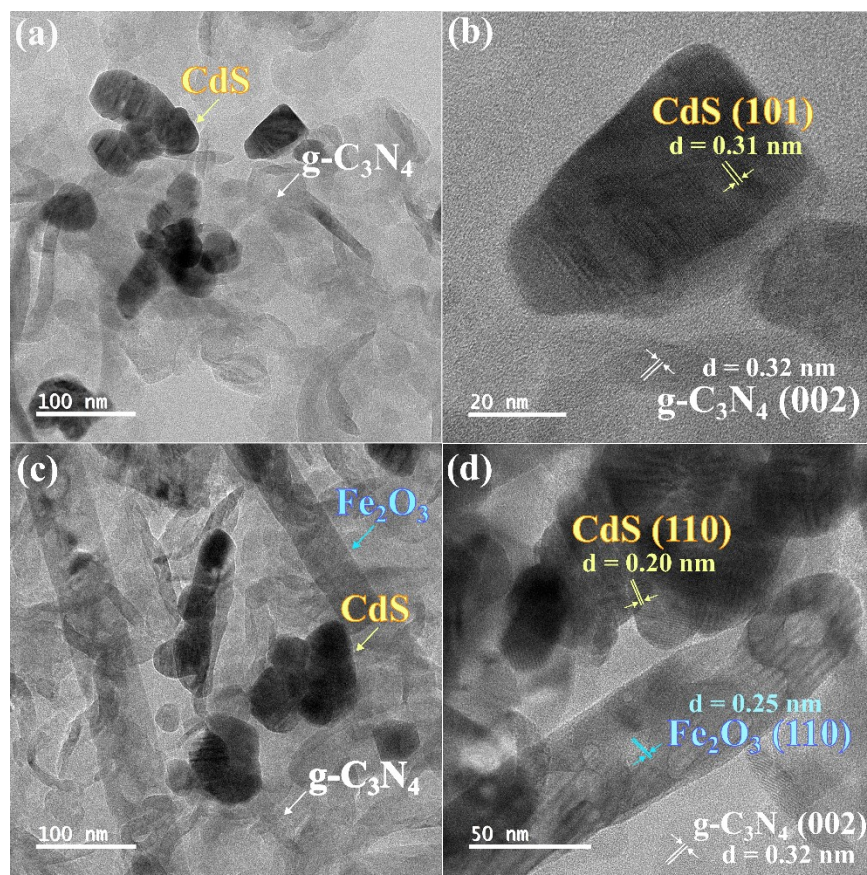

**Fig. S1.** TEM and HR-TEM images of g-C<sub>3</sub>N<sub>4</sub>/CdS (a-b) and 0.10Fe<sub>2</sub>O<sub>3</sub>/g-C<sub>3</sub>N<sub>4</sub>-CdS photocatalyst (c-d).

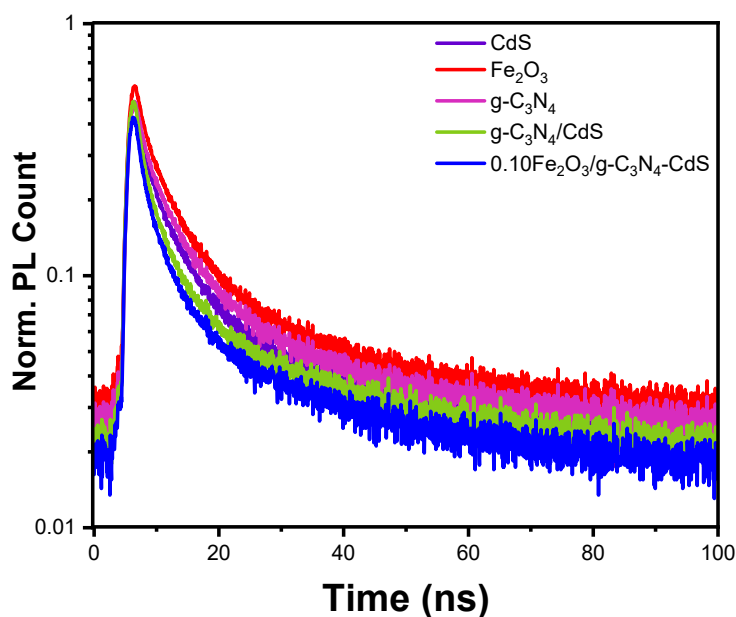

**Fig. S2** TRPL spectra of the prepared photocatalysts.

The amplitude-weighted average lifetime ( $\tau_{\text{Ave}}$ ) for charge carriers generated on the photocatalyst upon light illumination, and such value is calculated based on the following equation via substitution with the fitting parameters deduced from the TRPL results:

$$\tau_{\text{Ave}} = \frac{A_1\tau_1 + A_2\tau_2}{A_1 + A_2}$$

Where  $\tau_1$  and  $\tau_2$  are the lifetimes of radiative and non-radiative actions that occurred after the excitation process, respectively, and  $A_1$  and  $A_2$  are the pre-exponential factors.

**Table S1** Kinetic parameters derived from the Time-resolved PL decay spectra.

| Photocatalyst                        | $\tau_1$ (ns) | $\tau_2$ (ns) | $\tau_{\text{ave}}$ (ns) |
|--------------------------------------|---------------|---------------|--------------------------|
| CdS                                  | 1.8358        | 9.3138        | 5.26                     |
| $\text{Fe}_2\text{O}_3$              | 2.9806        | 12.3053       | 6.40                     |
| g- $\text{C}_3\text{N}_4$            | 2.6285        | 12.5369       | 5.48                     |
| g- $\text{C}_3\text{N}_4/\text{CdS}$ | 1.9806        | 9.3053        | 4.89                     |

|                                                                          |        |         |      |
|--------------------------------------------------------------------------|--------|---------|------|
| 0.10Fe <sub>2</sub> O <sub>3</sub> /g-C <sub>3</sub> N <sub>4</sub> /CdS | 1.6285 | 10.5369 | 4.78 |
|--------------------------------------------------------------------------|--------|---------|------|

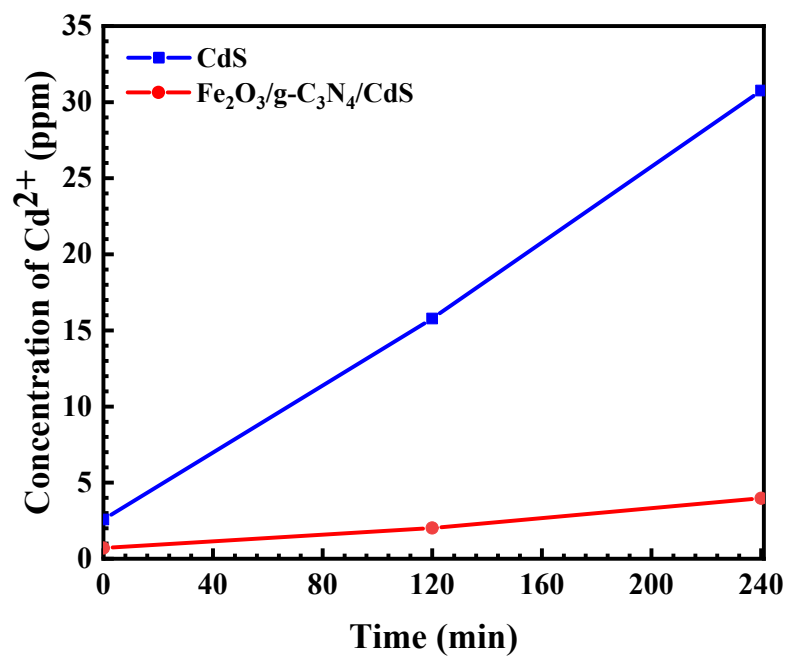

**Fig. S3** Monitoring the Cd<sup>2+</sup> detected in the TC solution in the presence of the prepared photocatalysts.
